# Supplementary material for: Surprising amount of stasis in repetitive genome content across the Brassicales
Source: bioRxiv or medRxiv preprint supplement (doi:10.1101/2020.06.15.153296), 2020-06-19
Supplement: Supplementary file [file media-1.pdf]

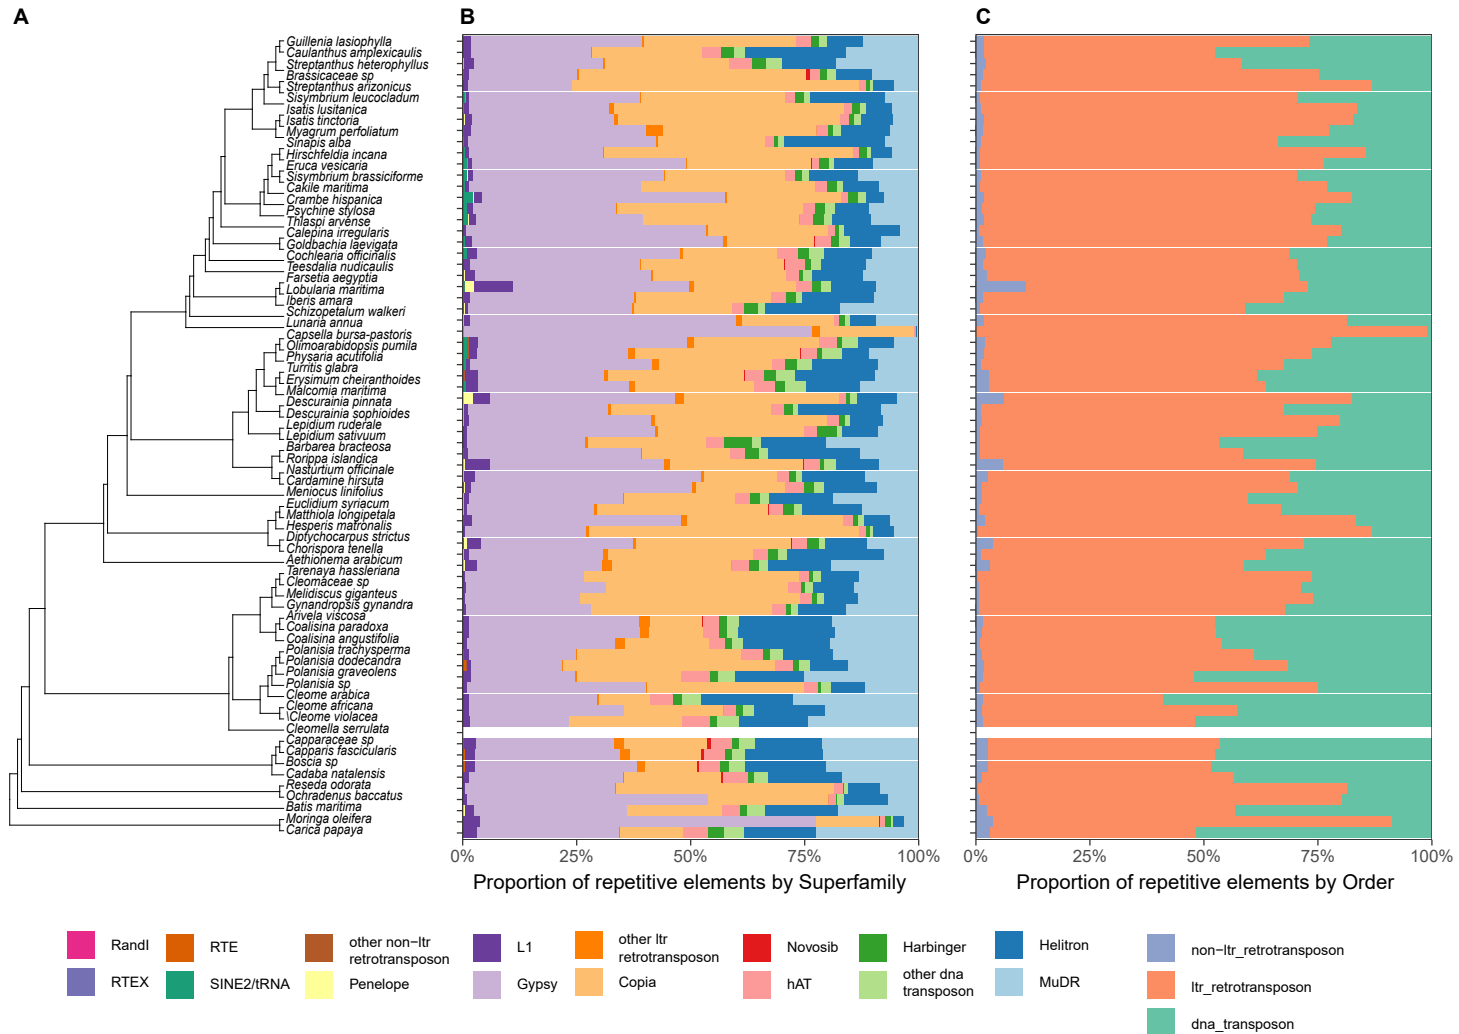

**Supplemental Figure 1.** Proportion plots of transposable element abundance scaled to 100%. (A) phylogeny of taxa, (B) by superfamily, (C) by order.

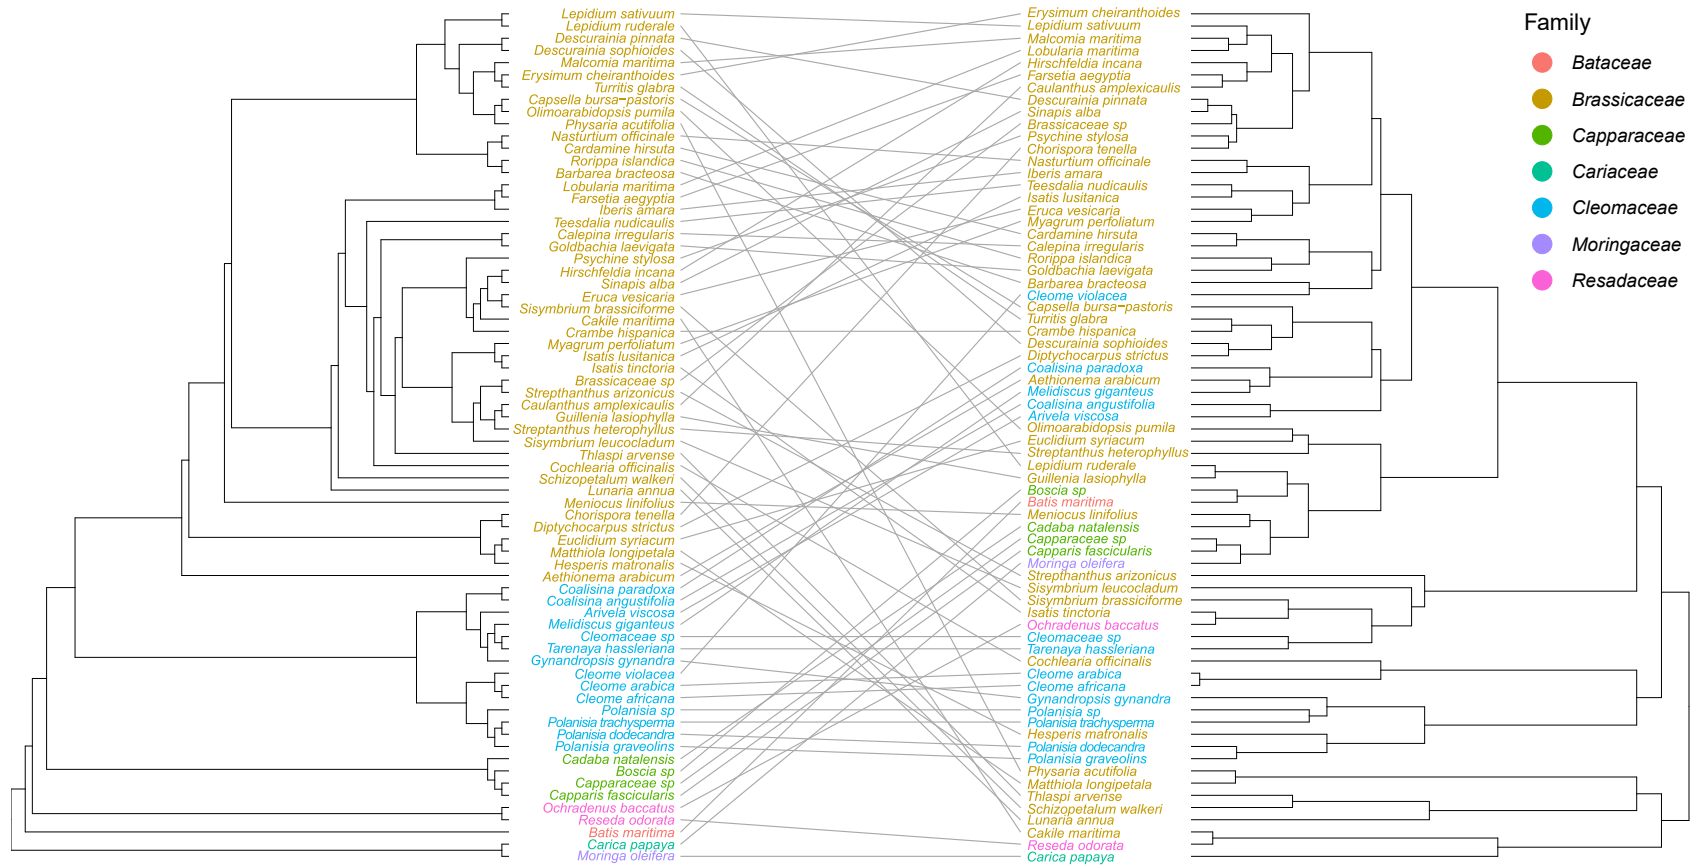

**Supplemental Figure 2.** Comparison of phylogenetic relationships across Brassicales in the ASTRAL tree obtained from transcriptome data (left) and based on hierarchical clustering of TE abundances (right).

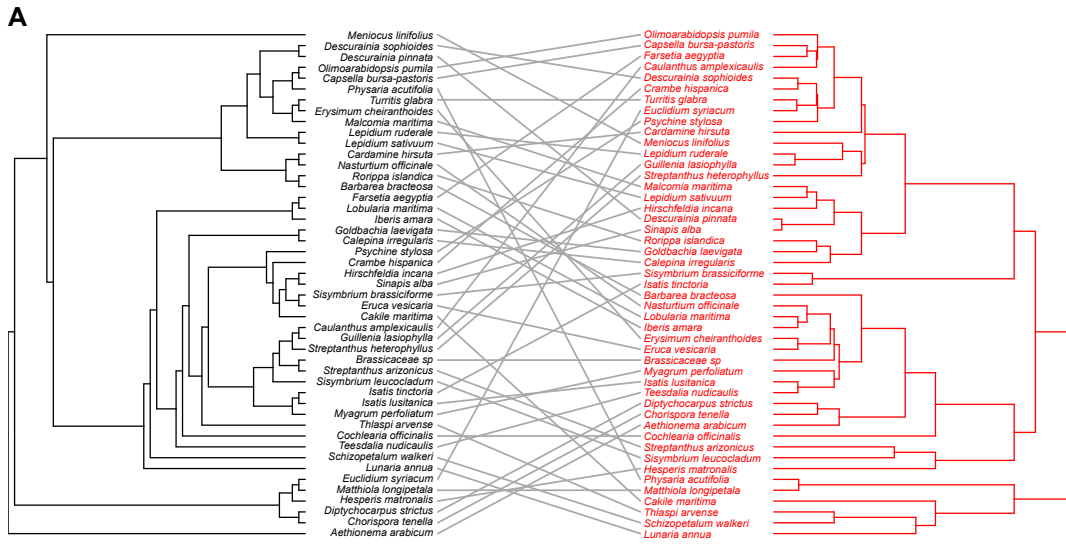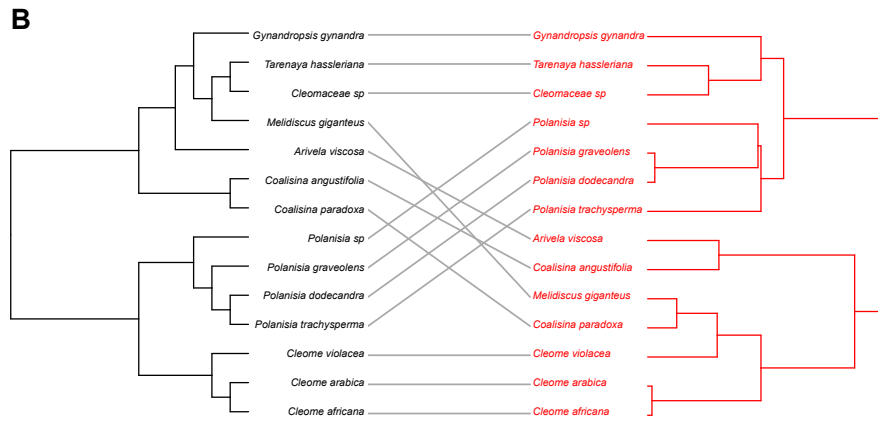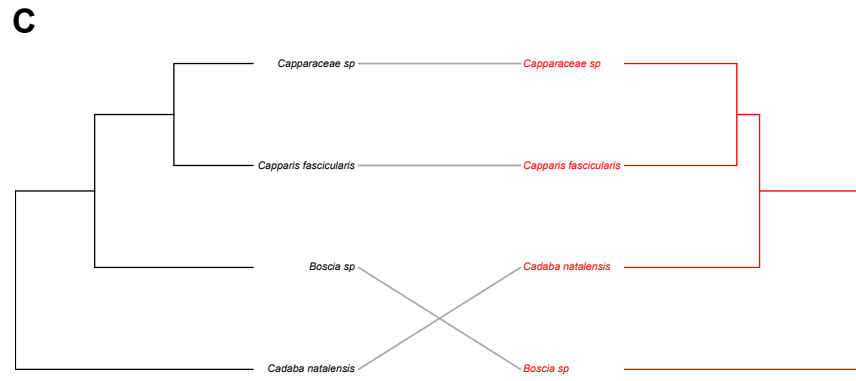

**Supplemental Figure 3.** Comparison of phylogenetic relationships in the ASTRAL tree obtained from transcriptome data (black) and based on hierarchical clustering of TE abundances (red) in (A) Brassicaceae, (B) Cleomaceae, and (C) Capparaceae.

**Supplemental Table 1.** Taxon sampling with genome size, chromosome counts, and repetitive element abundance. Chromosome counts as in <http://legacy.tropicos.org/Project/PCN>. Asterisks (\*) indicate samples with known ploidy level.

| Family       | Species                           | Genome Size (Mbp) | Chromosome count (n) | Copia  | Gypsy  | Harbinger | hAT    | Helitron | L1     | MuDR   | other DNA transposon | other ltr retrotransposon | other non-ltr retrotransposon | Penelope | SINEZ/IRNA | Novosib  | RTE      | RTEX     | RandI    | Total_RE |
|--------------|-----------------------------------|-------------------|----------------------|--------|--------|-----------|--------|----------|--------|--------|----------------------|---------------------------|-------------------------------|----------|------------|----------|----------|----------|----------|----------|
| Bataceae     | <i>Batis maritima</i>             | 356.97            | 11                   | 0.0734 | 0.1192 | 0.0058    | 0.0138 | 0.0571   | 0.0075 | 0.0625 | 1.38E-02             | 4.17E-04                  | 0.00E+00                      | 8.34E-04 | 0.00E+00   | 4.17E-04 | 8.34E-04 | 0.00E+00 | 0.00E+00 | 0.3556   |
| Brassicaceae | <i>Aethionema arabicum</i> *      | 933.99            | 11                   | 0.1557 | 0.1632 | 0.0129    | 0.0235 | 0.0811   | 0.0163 | 0.115  | 1.23E-02             | 1.36E-02                  | 4.04E-04                      | 2.16E-03 | 2.70E-04   | 0.00E+00 | 0.00E+00 | 0.00E+00 | 0.00E+00 | 0.5964   |
| Brassicaceae | <i>Meniocus linifolius</i>        | 899.76            |                      | 0.0997 | 0.1382 | 0.0098    | 0.0132 | 0.0581   | 0.0049 | 0.0768 | 7.48E-03             | 1.23E-03                  | 3.79E-04                      | 5.68E-04 | 0.00E+00   | 9.47E-05 | 2.84E-04 | 9.47E-05 | 0.00E+00 | 0.4107   |
| Brassicaceae | <i>Barbarea bracteosa</i>         | 268.95            | 8                    | 0.1068 | 0.2629 | 0.0124    | 0.0218 | 0.0637   | 0.0073 | 0.0491 | 1.13E-02             | 3.59E-03                  | 7.98E-05                      | 5.59E-04 | 1.92E-03   | 0.00E+00 | 3.19E-04 | 0.00E+00 | 0.00E+00 | 0.5417   |
| Brassicaceae | <i>Cakile maritima</i> *          | 1383.87           | 9                    | 0.1463 | 0.3109 | 0.0133    | 0.0082 | 0.0225   | 0.0101 | 0.0444 | 1.03E-02             | 1.33E-03                  | 0.00E+00                      | 6.66E-04 | 1.38E-02   | 0.00E+00 | 0.00E+00 | 0.00E+00 | 0.00E+00 | 0.5817   |
| Brassicaceae | <i>Calepina irregularis</i>       | 254.28            | 14                   | 0.0957 | 0.2056 | 0.0104    | 0.0213 | 0.0483   | 0.0095 | 0.0471 | 1.57E-02             | 2.97E-03                  | 6.20E-04                      | 2.48E-04 | 3.72E-03   | 0.00E+00 | 2.48E-04 | 1.24E-04 | 0.00E+00 | 0.4617   |
| Brassicaceae | <i>Capsella bursa-pastoris</i>    | 420.54            | 8,16                 | 0.1275 | 0.1617 | 0.0116    | 0.0218 | 0.0571   | 0.0122 | 0.0631 | 2.27E-02             | 7.04E-03                  | 8.80E-04                      | 6.40E-04 | 1.84E-03   | 3.20E-04 | 8.00E-04 | 1.60E-04 | 0.00E+00 | 0.4893   |
| Brassicaceae | <i>Cardamine hirsuta</i>          | 489               | 7,8                  | 0.0911 | 0.1797 | 0.0145    | 0.0153 | 0.0953   | 0.0036 | 0.0608 | 9.44E-03             | 1.42E-03                  | 3.78E-04                      | 2.83E-04 | 4.72E-04   | 0.00E+00 | 7.55E-04 | 0.00E+00 | 0.00E+00 | 0.4731   |
| Brassicaceae | <i>Caulanthus amplexicaulis</i> * | 484.11            |                      | 0.1521 | 0.1708 | 0.0084    | 0.0146 | 0.0362   | 0.0074 | 0.0549 | 7.60E-03             | 1.36E-03                  | 3.90E-04                      | 0.00E+00 | 0.00E+00   | 9.74E-05 | 5.84E-04 | 0.00E+00 | 0.00E+00 | 0.4544   |
| Brassicaceae | <i>Chorispora tenella</i>         | 366.75            | 7                    | 0.174  | 0.1702 | 0.0126    | 0.0175 | 0.0471   | 0.0167 | 0.0578 | 7.26E-03             | 3.98E-03                  | 6.96E-04                      | 2.59E-03 | 8.95E-04   | 9.94E-05 | 3.98E-04 | 0.00E+00 | 0.00E+00 | 0.5118   |
| Brassicaceae | <i>Cochlearia officinalis</i>     | 734               | 12                   | 0.1941 | 0.231  | 0.009     | 0.0271 | 0.0615   | 0.0082 | 0.0707 | 1.32E-02             | 1.12E-03                  | 3.75E-04                      | 2.50E-04 | 0.00E+00   | 5.00E-04 | 9.99E-04 | 0.00E+00 | 0.00E+00 | 0.6181   |
| Brassicaceae | <i>Crambe hispanica</i> *         | 660.15            | 15,30                | 0.1942 | 0.1496 | 0.0099    | 0.0126 | 0.0362   | 0.0053 | 0.0513 | 9.91E-03             | 5.08E-04                  | 2.54E-04                      | 2.54E-04 | 4.49E-03   | 0.00E+00 | 1.69E-04 | 8.47E-05 | 0.00E+00 | 0.4749   |
| Brassicaceae | <i>Descurainia pinnata</i> *      | 371.64            | 7                    | 0.1866 | 0.1963 | 0.0069    | 0.0124 | 0.0356   | 0.0056 | 0.0383 | 5.44E-03             | 4.57E-03                  | 3.89E-04                      | 1.36E-03 | 9.72E-05   | 9.72E-05 | 2.91E-04 | 0.00E+00 | 0.00E+00 | 0.4939   |
| Brassicaceae | <i>Descurainia sophioides</i> *   | 195.6             | 7,14                 | 0.175  | 0.1532 | 0.0096    | 0.014  | 0.0897   | 0.0045 | 0.0412 | 6.16E-03             | 2.22E-03                  | 1.01E-04                      | 1.01E-03 | 3.03E-04   | 0.00E+00 | 1.01E-04 | 0.00E+00 | 0.00E+00 | 0.4973   |
| Brassicaceae | <i>Diptychocarpus strictus</i> *  | 557.46            | 7                    | 0.1625 | 0.1509 | 0.0106    | 0.0168 | 0.1085   | 0.0051 | 0.0385 | 1.05E-02             | 4.98E-03                  | 4.24E-04                      | 4.24E-04 | 3.18E-04   | 1.06E-04 | 3.18E-04 | 0.00E+00 | 0.00E+00 | 0.5101   |
| Brassicaceae | <i>Eruca vesicaria</i> *          | 709.05            | 11                   | 0.1464 | 0.2511 | 0.012     | 0.008  | 0.0465   | 0.0053 | 0.0529 | 5.58E-03             | 4.04E-04                  | 2.42E-04                      | 0.00E+00 | 5.33E-03   | 1.62E-04 | 3.23E-04 | 1.62E-04 | 0.00E+00 | 0.5345   |
| Brassicaceae | <i>Erysimum cheiranthoides</i>    | 420.54            | 8                    | 0.1424 | 0.2372 | 0.0056    | 0.0196 | 0.041    | 0.0093 | 0.0274 | 1.84E-02             | 7.27E-03                  | 2.32E-03                      | 1.83E-04 | 5.01E-03   | 2.44E-04 | 3.05E-04 | 0.00E+00 | 0.00E+00 | 0.5164   |
| Brassicaceae | <i>Euclidium syriacum</i> *       | 298.29            | 7                    | 0.1686 | 0.1255 | 0.0105    | 0.014  | 0.0591   | 0.0027 | 0.0554 | 7.99E-03             | 2.00E-03                  | 5.26E-04                      | 4.20E-04 | 1.05E-04   | 4.20E-04 | 4.20E-04 | 0.00E+00 | 0.00E+00 | 0.4477   |
| Brassicaceae | <i>Farsetia aegyptica</i>         | 2004.9            | 24                   | 0.142  | 0.1715 | 0.0101    | 0.0155 | 0.0753   | 0.0067 | 0.0471 | 6.58E-03             | 2.55E-03                  | 8.22E-05                      | 2.47E-04 | 8.22E-04   | 8.22E-05 | 3.29E-04 | 8.22E-05 | 0.00E+00 | 0.479    |
| Brassicaceae | <i>Goldbachia laevigata</i>       | 547.68            | 14                   | 0.0885 | 0.2542 | 0.0076    | 0.0168 | 0.0314   | 0.0072 | 0.0382 | 1.14E-02             | 4.31E-03                  | 1.96E-04                      | 1.96E-04 | 2.06E-03   | 2.94E-04 | 4.89E-04 | 0.00E+00 | 0.00E+00 | 0.463    |
| Brassicaceae | <i>Guillenia lasiophylla</i>      | 621.03            |                      | 0.0908 | 0.0997 | 0.0116    | 0.0153 | 0.0846   | 0.0066 | 0.06   | 8.36E-03             | 1.38E-03                  | 2.30E-04                      | 1.53E-04 | 0.00E+00   | 1.53E-04 | 0.00E+00 | 0.00E+00 | 0.00E+00 | 0.3788   |
| Brassicaceae | <i>Hesperis matronalis</i>        | 3261.63           | 7                    | 0.395  | 0.1763 | 0.0056    | 0.0097 | 0.0321   | 0.0038 | 0.0354 | 4.32E-03             | 4.75E-03                  | 0.00E+00                      | 0.00E+00 | 7.38E-04   | 0.00E+00 | 0.00E+00 | 0.00E+00 | 0.00E+00 | 0.6677   |
| Brassicaceae | <i>Hirschfeldia incana</i>        | 552.57            | 7                    | 0.1222 | 0.1947 | 0.0072    | 0.0107 | 0.0505   | 0.0056 | 0.0616 | 6.36E-03             | 1.47E-03                  | 4.71E-04                      | 5.89E-05 | 4.59E-03   | 0.00E+00 | 1.18E-04 | 5.89E-05 | 0.00E+00 | 0.4655   |
| Brassicaceae | <i>Iberis amara</i> *             | 831.3             | 7                    | 0.1167 | 0.1951 | 0.0173    | 0.014  | 0.0897   | 0.0046 | 0.0929 | 7.37E-03             | 2.05E-03                  | 2.12E-04                      | 4.96E-04 | 1.35E-03   | 7.08E-05 | 2.12E-04 | 0.00E+00 | 0.00E+00 | 0.542    |
| Brassicaceae | <i>Isatis lusitanica</i>          | 381.42            | 14                   | 0.1909 | 0.2181 | 0.0067    | 0.0139 | 0.0602   | 0.0085 | 0.0359 | 9.47E-03             | 1.99E-02                  | 1.39E-04                      | 0.00E+00 | 1.39E-03   | 0.00E+00 | 2.79E-04 | 0.00E+00 | 0.00E+00 | 0.5654   |
| Brassicaceae | <i>Isatis tinctoria</i> *         | 616.14            | 8,16                 | 0.2403 | 0.1527 | 0.0044    | 0.0102 | 0.0346   | 0.0086 | 0.0271 | 8.30E-03             | 4.12E-03                  | 4.31E-04                      | 5.54E-04 | 9.84E-04   | 6.15E-05 | 1.85E-04 | 0.00E+00 | 0.00E+00 | 0.4925   |

|              |                                   |         |       |        |        |        |        |        |        |        |          |          |          |          |          |          |          |          |          |        |
|--------------|-----------------------------------|---------|-------|--------|--------|--------|--------|--------|--------|--------|----------|----------|----------|----------|----------|----------|----------|----------|----------|--------|
| Brassicaceae | <i>Lepidium ruderale</i>          | 371.64  | 12,16 | 0.1015 | 0.1015 | 0.0234 | 0.0158 | 0.0561 | 0.003  | 0.0795 | 7.69E-03 | 2.53E-03 | 0.00E+00 | 3.89E-04 | 0.00E+00 | 0.00E+00 | 3.89E-04 | 9.73E-05 | 0.00E+00 | 0.3918 |
| Brassicaceae | <i>Lepidium sativuum*</i>         | 591.69  | 12    | 0.1574 | 0.2023 | 0.0225 | 0.0131 | 0.038  | 0.0044 | 0.0439 | 5.46E-03 | 3.64E-03 | 1.07E-04 | 1.07E-04 | 0.00E+00 | 0.00E+00 | 4.28E-04 | 0.00E+00 | 0.00E+00 | 0.4912 |
| Brassicaceae | <i>Lobularia maritima</i>         | 312.96  | 15    | 0.1145 | 0.1981 | 0.01   | 0.0185 | 0.0507 | 0.0447 | 0.0483 | 1.12E-02 | 6.33E-03 | 0.00E+00 | 1.09E-02 | 1.45E-03 | 2.64E-04 | 7.92E-04 | 0.00E+00 | 0.00E+00 | 0.5158 |
| Brassicaceae | <i>Lunaria annua*</i>             | 498.78  | 8     | 0.1296 | 0.4807 | 0      | 0.002  | 0.0024 | 0      | 0.0016 | 0.00E+00 | 1.05E-02 | 0.00E+00 | 0.00E+00 | 0.00E+00 | 0.00E+00 | 0.00E+00 | 0.00E+00 | 0.00E+00 | 0.6269 |
| Brassicaceae | <i>Malcomia maritima*</i>         | 312.96  | 7     | 0.1218 | 0.1949 | 0.0136 | 0.0129 | 0.07   | 0.0048 | 0.0436 | 1.62E-02 | 6.46E-03 | 2.75E-04 | 1.38E-04 | 3.16E-03 | 0.00E+00 | 2.75E-04 | 0.00E+00 | 0.00E+00 | 0.4882 |
| Brassicaceae | <i>Matthiola longipetala</i>      | 1599.03 | 7     | 0.2362 | 0.316  | 0.0086 | 0.0146 | 0.0395 | 0.0118 | 0.0432 | 7.71E-03 | 9.56E-03 | 7.14E-04 | 1.28E-03 | 0.00E+00 | 0.00E+00 | 7.14E-04 | 0.00E+00 | 0.00E+00 | 0.69   |
| Brassicaceae | <i>Myagrurn perfoliatum*</i>      | 352.08  | 16    | 0.1296 | 0.2265 | 0.0053 | 0.01   | 0.1219 | 0.006  | 0.041  | 6.75E-03 | 3.45E-03 | 1.57E-04 | 0.00E+00 | 7.85E-04 | 1.57E-04 | 3.14E-04 | 0.00E+00 | 0.00E+00 | 0.552  |
| Brassicaceae | <i>Nasturtium officinale</i>      | 430.32  | 15    | 0.1584 | 0.206  | 0.0046 | 0.0198 | 0.052  | 0.029  | 0.0463 | 1.35E-02 | 6.96E-03 | 1.31E-04 | 2.23E-03 | 3.94E-04 | 2.63E-04 | 2.63E-04 | 1.31E-04 | 0.00E+00 | 0.54   |
| Brassicaceae | <i>Olimoarabidopsis pumila</i>    | 410.76  | 5     | 0.132  | 0.1227 | 0.0119 | 0.0191 | 0.0773 | 0.012  | 0.0425 | 1.81E-02 | 4.07E-03 | 9.20E-04 | 3.94E-04 | 8.54E-04 | 6.57E-05 | 5.26E-04 | 6.57E-05 | 0.00E+00 | 0.4424 |
| Brassicaceae | <i>Physaria acutifolia</i>        | 2322.75 |       | 0.2462 | 0.2936 | 0.0066 | 0.0115 | 0.0627 | 0.0274 | 0.0348 | 1.04E-02 | 1.27E-02 | 6.49E-05 | 1.62E-02 | 0.00E+00 | 0.00E+00 | 6.49E-04 | 1.30E-04 | 0.00E+00 | 0.723  |
| Brassicaceae | <i>Sisymbrium leucocladum</i>     | 498.78  | 8     | 0.2872 | 0.1753 | 0.0099 | 0.0098 | 0.0325 | 0.0072 | 0.0331 | 7.51E-03 | 5.03E-03 | 2.40E-04 | 0.00E+00 | 8.79E-04 | 3.19E-04 | 2.40E-04 | 0.00E+00 | 0.00E+00 | 0.5693 |
| Brassicaceae | <i>Psychine stylosa</i>           | 518.34  | 16    | 0.1695 | 0.1805 | 0.0121 | 0.0147 | 0.0432 | 0.0085 | 0.0509 | 7.72E-03 | 2.86E-04 | 4.77E-04 | 9.53E-05 | 5.62E-03 | 0.00E+00 | 2.86E-04 | 0.00E+00 | 0.00E+00 | 0.4938 |
| Brassicaceae | <i>Rorippa islandica*</i>         | 567.24  | 10    | 0.0786 | 0.2426 | 0.0082 | 0.0121 | 0.0672 | 0.0123 | 0.0574 | 6.64E-03 | 3.50E-03 | 1.21E-04 | 3.62E-04 | 6.64E-04 | 0.00E+00 | 1.81E-04 | 0.00E+00 | 0.00E+00 | 0.4899 |
| Brassicaceae | <i>Schizopetalum walkeri</i>      | 1775.07 | 12    | 0.1289 | 0.3687 | 0.0073 | 0.0074 | 0.0363 | 0.009  | 0.0584 | 7.69E-03 | 7.84E-03 | 0.00E+00 | 2.22E-03 | 0.00E+00 | 1.48E-04 | 1.48E-04 | 0.00E+00 | 0.00E+00 | 0.634  |
| Brassicaceae | <i>Sinapis alba*</i>              | 557.46  | 7     | 0.1894 | 0.1884 | 0.0103 | 0.0137 | 0.0391 | 0.0038 | 0.0434 | 6.77E-03 | 4.90E-04 | 3.92E-04 | 1.96E-04 | 2.45E-03 | 9.81E-05 | 1.96E-04 | 9.81E-05 | 0.00E+00 | 0.4989 |
| Brassicaceae | <i>Sisymbrium brassiciforme</i>   | NA      | 14    | 0.2708 | 0.1461 | 0.0091 | 0.0063 | 0.0223 | 0.004  | 0.0292 | 4.39E-03 | 4.18E-04 | 1.04E-04 | 5.22E-05 | 2.40E-03 | 0.00E+00 | 3.13E-04 | 5.22E-05 | 0.00E+00 | 0.4955 |
| Brassicaceae | <i>Brassicaceae sp*</i>           | 1036.68 | 14    | 0.1639 | 0.1945 | 0.0108 | 0.0112 | 0.0858 | 0.0041 | 0.0377 | 5.69E-03 | 4.90E-04 | 2.94E-04 | 0.00E+00 | 2.65E-03 | 9.81E-05 | 2.94E-04 | 1.96E-04 | 0.00E+00 | 0.5176 |
| Brassicaceae | <i>Streptanthus arizonicus</i>    | 1090.47 |       | 0.3666 | 0.1325 | 0.0053 | 0.0089 | 0.0259 | 0.0059 | 0.0318 | 3.97E-03 | 5.68E-04 | 2.27E-04 | 7.95E-04 | 0.00E+00 | 0.00E+00 | 2.27E-04 | 0.00E+00 | 0.00E+00 | 0.5826 |
| Brassicaceae | <i>Streptanthus heterophyllus</i> | 748.17  | 18    | 0.1889 | 0.0898 | 0.0052 | 0.009  | 0.0298 | 0.0046 | 0.0384 | 7.93E-03 | 1.00E-03 | 7.70E-05 | 7.70E-05 | 0.00E+00 | 2.77E-03 | 1.00E-03 | 0.00E+00 | 7.70E-05 | 0.3787 |
| Brassicaceae | <i>Teesdalia nudicaulis</i>       | 557.46  | 7     | 0.1623 | 0.2155 | 0.0056 | 0.0154 | 0.0625 | 0.0117 | 0.0674 | 1.02E-02 | 1.70E-03 | 9.26E-04 | 1.23E-03 | 0.00E+00 | 1.54E-04 | 9.26E-04 | 0.00E+00 | 0.00E+00 | 0.5555 |
| Brassicaceae | <i>Thlaspi arvense*</i>           | 205.38  | 6     | 0.173  | 0.3441 | 0.0067 | 0.009  | 0.0807 | 0.005  | 0.0264 | 6.04E-03 | 1.56E-03 | 2.08E-04 | 0.00E+00 | 0.00E+00 | 1.04E-04 | 3.12E-04 | 0.00E+00 | 0.00E+00 | 0.653  |
| Brassicaceae | <i>Turritis glabra</i>            | 919.32  |       | 0.1671 | 0.1524 | 0.0046 | 0.0171 | 0.0281 | 0.0084 | 0.0498 | 2.00E-02 | 7.78E-03 | 1.60E-03 | 1.50E-04 | 4.59E-03 | 2.49E-04 | 1.50E-04 | 0.00E+00 | 0.00E+00 | 0.462  |
| Capparaceae  | <i>Boscia sp</i>                  | 410.76  |       | 0.0452 | 0.1392 | 0.0076 | 0.0183 | 0.0691 | 0.0079 | 0.0791 | 1.37E-02 | 6.31E-03 | 0.00E+00 | 1.77E-04 | 5.89E-05 | 1.18E-03 | 2.36E-03 | 0.00E+00 | 0.00E+00 | 0.3903 |
| Capparaceae  | <i>Cadaba natalensis</i>          | 259.17  |       | 0.0935 | 0.1473 | 0.0061 | 0.0239 | 0.0699 | 0.0057 | 0.0735 | 1.39E-02 | 4.74E-04 | 0.00E+00 | 0.00E+00 | 1.18E-04 | 1.36E-03 | 4.14E-04 | 0.00E+00 | 0.00E+00 | 0.4359 |
| Capparaceae  | <i>Capparis fascicularis</i>      | 1139.37 |       | 0.0744 | 0.1245 | 0.0057 | 0.0194 | 0.0598 | 0.0099 | 0.0867 | 1.46E-02 | 8.99E-03 | 0.00E+00 | 9.46E-05 | 5.68E-04 | 2.93E-03 | 1.14E-03 | 9.46E-05 | 0.00E+00 | 0.4088 |
| Capparaceae  | <i>Capparaceae sp</i>             | 611.25  | 9     | 0.0661 | 0.1331 | 0.0063 | 0.0194 | 0.0712 | 0.0094 | 0.0887 | 1.28E-02 | 9.71E-03 | 9.16E-05 | 1.83E-04 | 3.66E-04 | 1.92E-03 | 1.92E-03 | 2.75E-04 | 0.00E+00 | 0.4215 |
| Cariaceae    | <i>Carica papaya</i>              | 372     |       | 0.0588 | 0.3111 | 0.0048 | 0.0052 | 0.0104 | 0.0166 | 0.0131 | 2.39E-03 | 7.02E-05 | 1.40E-05 | 2.81E-05 | 0.00E+00 | 2.39E-04 | 0.00E+00 | 0.00E+00 | 0.00E+00 | 0.4228 |
| Cleomaceae   | <i>Cleome africana</i>            | 484.11  |       | 0.0735 | 0.2358 | 0.0122 | 0.0221 | 0.1306 | 0.0088 | 0.1201 | 1.58E-02 | 1.49E-02 | 9.97E-05 | 1.99E-04 | 0.00E+00 | 4.99E-04 | 6.98E-04 | 1.99E-04 | 0.00E+00 | 0.6354 |
| Cleomaceae   | <i>Coalisina angustifolia</i>     | 342.3   | 10    | 0.1041 | 0.1621 | 0.0076 | 0.0133 | 0.0747 | 0.0062 | 0.0982 | 1.07E-02 | 7.96E-04 | 1.33E-04 | 3.98E-04 | 1.33E-04 | 0.00E+00 | 0.00E+00 | 0.00E+00 | 0.00E+00 | 0.4783 |
| Cleomaceae   | <i>Cleome arabica</i>             | 464.55  |       | 0.0757 | 0.2393 | 0.0121 | 0.022  | 0.1364 | 0.0082 | 0.1171 | 1.42E-02 | 1.38E-02 | 0.00E+00 | 3.89E-04 | 0.00E+00 | 9.72E-05 | 9.72E-05 | 9.72E-05 | 0.00E+00 | 0.6394 |
| Cleomaceae   | <i>Polanisia sp</i>               | 709.05  |       | 0.2838 | 0.1974 | 0.0087 | 0.0212 | 0.0746 | 0.0045 | 0.1143 | 1.13E-02 | 3.64E-04 | 0.00E+00 | 9.10E-05 | 0.00E+00 | 9.10E-05 | 9.10E-05 | 0.00E+00 | 0.00E+00 | 0.7165 |
| Cleomaceae   | <i>Coalisina paradoxa</i>         | 484.11  |       | 0.1414 | 0.1237 | 0.0097 | 0.0341 | 0.0859 | 0.0084 | 0.1387 | 2.76E-02 | 9.02E-04 | 8.20E-05 | 1.64E-04 | 0.00E+00 | 4.10E-04 | 4.10E-04 | 0.00E+00 | 0.00E+00 | 0.5715 |

|             |                               |        |       |        |        |        |        |        |        |        |          |          |          |          |          |          |          |          |          |        |
|-------------|-------------------------------|--------|-------|--------|--------|--------|--------|--------|--------|--------|----------|----------|----------|----------|----------|----------|----------|----------|----------|--------|
| Cleomaceae  | <i>Cleomaceae sp</i>          | 322.74 |       | 0.2117 | 0.139  | 0.0083 | 0.0284 | 0.0647 | 0.0064 | 0.11   | 1.80E-02 | 3.70E-04 | 2.22E-04 | 7.40E-05 | 0.00E+00 | 4.44E-04 | 1.63E-03 | 0.00E+00 | 7.40E-05 | 0.5891 |
| Cleomaceae  | <i>Cleome violacea</i>        | 474.33 |       | 0.1074 | 0.1905 | 0.0094 | 0.021  | 0.1124 | 0.0045 | 0.1136 | 1.34E-02 | 1.35E-02 | 1.09E-04 | 5.45E-04 | 0.00E+00 | 3.27E-04 | 6.54E-04 | 0.00E+00 | 0.00E+00 | 0.5874 |
| Cleomaceae  | <i>Melidiscus giganteus</i>   | 420.54 | 10    | 0.1345 | 0.1361 | 0.0094 | 0.0381 | 0.0889 | 0.0097 | 0.1485 | 2.26E-02 | 1.58E-03 | 7.55E-05 | 2.26E-04 | 0.00E+00 | 7.55E-04 | 4.53E-04 | 0.00E+00 | 0.00E+00 | 0.5909 |
| Cleomaceae  | <i>Arivela viscosa</i>        | 268.95 | 16,17 | 0.0521 | 0.1302 | 0.0099 | 0.0231 | 0.0931 | 0.0067 | 0.1282 | 1.94E-02 | 2.19E-03 | 0.00E+00 | 1.29E-04 | 0.00E+00 | 1.29E-04 | 2.58E-04 | 0.00E+00 | 0.00E+00 | 0.4654 |
| Cleomaceae  | <i>Cleomella serrulata</i>    | NA     |       | NA     | NA     | NA     | NA     | NA     | NA     | NA     | NA       | NA       | NA       | NA       | NA       | NA       | NA       | NA       | NA       | NA     |
| Cleomaceae  | <i>Gynanadropsis gynandra</i> | 1124.7 | 17,18 | 0.2219 | 0.2522 | 0.0055 | 0.0183 | 0.0476 | 0.0049 | 0.0756 | 1.29E-02 | 8.43E-04 | 0.00E+00 | 1.40E-04 | 0.00E+00 | 2.81E-04 | 7.02E-04 | 0.00E+00 | 0.00E+00 | 0.6408 |
| Cleomaceae  | <i>Polanisia dodecandra</i>   | 733.5  | 10    | 0.3409 | 0.1883 | 0.0072 | 0.0154 | 0.0596 | 0.0042 | 0.0945 | 1.31E-02 | 1.68E-04 | 1.68E-04 | 0.00E+00 | 0.00E+00 | 1.68E-04 | 8.42E-05 | 0.00E+00 | 0.00E+00 | 0.7239 |
| Cleomaceae  | <i>Polanisia graveolens</i>   | 723.72 |       | 0.3499 | 0.1821 | 0.0078 | 0.0181 | 0.054  | 0.0042 | 0.096  | 1.20E-02 | 2.56E-04 | 8.52E-05 | 2.56E-04 | 0.00E+00 | 8.52E-05 | 8.52E-05 | 0.00E+00 | 0.00E+00 | 0.7248 |
| Cleomaceae  | <i>Polanisia trachysperma</i> | 699.27 | 10    | 0.288  | 0.2218 | 0.0071 | 0.0198 | 0.0657 | 0.0051 | 0.1022 | 1.18E-02 | 6.44E-04 | 0.00E+00 | 9.19E-05 | 0.00E+00 | 9.19E-05 | 2.76E-04 | 0.00E+00 | 0.00E+00 | 0.7224 |
| Cleomaceae  | <i>Tarenaya hassleriana</i>   | 435.21 | 10    | 0.2576 | 0.1102 | 0.0069 | 0.0221 | 0.046  | 0.0052 | 0.0855 | 1.39E-02 | 1.51E-03 | 6.57E-05 | 1.31E-04 | 0.00E+00 | 1.97E-04 | 5.19E-03 | 0.00E+00 | 0.00E+00 | 0.5544 |
| Moringaceae | <i>Moringa oleifera</i>       | 386.31 | 11    | 0.0596 | 0.1354 | 0.0147 | 0.0241 | 0.0694 | 0.0134 | 0.0972 | 1.86E-02 | 6.46E-04 | 0.00E+00 | 3.23E-04 | 0.00E+00 | 4.84E-04 | 1.61E-04 | 0.00E+00 | 0.00E+00 | 0.4339 |
| Resadaceae  | <i>Ochradenus baccatus</i>    | 870.42 | 24,28 | 0.2406 | 0.1654 | 0.0017 | 0.0091 | 0.0349 | 0.002  | 0.0424 | 4.27E-03 | 1.86E-04 | 1.86E-04 | 1.86E-04 | 0.00E+00 | 1.86E-04 | 1.86E-04 | 0.00E+00 | 0.00E+00 | 0.5014 |
| Resadaceae  | <i>Reseda odorata</i>         | 498.78 |       | 0.1566 | 0.3133 | 0.0022 | 0.0091 | 0.0562 | 0.0046 | 0.0398 | 9.51E-03 | 4.42E-04 | 4.42E-04 | 4.42E-04 | 0.00E+00 | 0.00E+00 | 0.00E+00 | 0.00E+00 | 0.00E+00 | 0.5926 |

**Supplemental Table 2.** List of mitochondrial and chloroplast sequences used for data filtering.

| Mitochondrial reads                                               | Chloroplast reads                                                                       |
|-------------------------------------------------------------------|-----------------------------------------------------------------------------------------|
| Brassica napus mitochondrial linear plasmid, complete sequence    | Arabidopsis thaliana chloroplast, complete genome                                       |
| Brassica napus mitochondrion, complete genome                     | Aethionema cordifolium chloroplast, complete genome                                     |
| Carica papaya mitochondrion, complete genome                      | Aethionema grandiflorum chloroplast, complete genome                                    |
| Brassica oleracea mitochondrion, complete genome                  | Olimarabidopsis pumila chloroplast, complete genome                                     |
| Brassica carinata mitochondrion, complete genome                  | Arabis hirsuta chloroplast, complete genome                                             |
| Brassica juncea mitochondrion, complete genome                    | Barbarea verna chloroplast, complete genome                                             |
| Brassica rapa subsp. campestris mitochondrion, complete genome    | Capsella bursa-pastoris chloroplast, complete genome                                    |
| Raphanus sativus mitochondrion, complete genome                   | Crucihimalaya wallichii chloroplast, complete genome                                    |
| Batis maritima mitochondrion, complete genome                     | Draba nemorosa chloroplast, complete genome                                             |
| Brassica nigra mitochondrion, complete genome                     | Lepidium virginicum chloroplast, complete genome                                        |
| Sinapis arvensis mitochondrion, complete genome                   | Lobularia maritima chloroplast, complete genome                                         |
| Arabis alpina mitochondrion, complete genome                      | Nasturtium officinale chloroplast, complete genome                                      |
| Arabidopsis thaliana ecotype Col-0 mitochondrion, complete genome | Carica papaya chloroplast, complete genome                                              |
| Boechera stricta mitochondrion, complete genome                   | Brassica rapa subsp. pekinensis chloroplast, complete genome                            |
|                                                                   | Brassica napus chloroplast, complete genome                                             |
|                                                                   | Pachycladon enysii chloroplast, complete genome                                         |
|                                                                   | Pachycladon cheesemanii chloroplast, complete genome                                    |
|                                                                   | Arabis alpina complete chloroplast genome                                               |
|                                                                   | Raphanus sativus chloroplast, complete genome                                           |
|                                                                   | Capsella rubella chloroplast, complete genome                                           |
|                                                                   | Eutrema salsugineum chloroplast, complete genome                                        |
|                                                                   | Brassica juncea chloroplast, complete genome                                            |
|                                                                   | Isatis tinctoria voucher cp-824 chloroplast, complete genome                            |
|                                                                   | Capsella grandiflora chloroplast, complete genome                                       |
|                                                                   | Schrenkiella parvula chloroplast, complete genome                                       |
|                                                                   | Eutrema yunnanense chloroplast, complete genome                                         |
|                                                                   | Eutrema heterophyllum chloroplast, complete genome                                      |
|                                                                   | Cochlearia borzaeana chloroplast genome, complete sequence, isolate Cbor_1063           |
|                                                                   | Cochlearia islandica chloroplast genome, complete sequence, isolate Cisla_1233          |
|                                                                   | Cochlearia pyrenaica chloroplast genome, complete sequence, isolate Cpyr_0260           |
|                                                                   | Cochlearia tridactylites chloroplast genome, complete sequence, isolate Ctri_1288       |
|                                                                   | Ionopsidium acaule chloroplast genome, complete sequence, isolate Iacau_1072            |
|                                                                   | Arabidopsis arenosa chloroplast genome, complete sequence, specimen voucher PUSTE-A     |
|                                                                   | Arabidopsis cebennensis chloroplast genome, complete sequence, specimen voucher 138R-17 |
|                                                                   | Arabidopsis pedemontana chloroplast genome, complete sequence, specimen voucher 114R-03 |
|                                                                   | Camelina sativa chloroplast genome, complete sequence, specimen voucher B-2007-0434-12  |
|                                                                   | Eutrema halophilum chloroplast, complete genome                                         |
|                                                                   | Eutrema botschantzevii chloroplast, complete genome                                     |
|                                                                   | Arabidopsis arenicola chloroplast genome, complete sequence, isolate 2329               |
|                                                                   | Arabidopsis croatica chloroplast genome, complete sequence, isolate ACR                 |

|                                                                                   |
|-----------------------------------------------------------------------------------|
| Arabidopsis neglecta chloroplast genome, complete sequence, isolate AA095-F       |
| Arabidopsis petrogena chloroplast genome, complete sequence, isolate SK08-h       |
| Arabidopsis suecica chloroplast genome, complete sequence, isolate AS459          |
| Arabidopsis umezawana chloroplast genome, complete sequence, isolate 504865       |
| Brassica nigra chloroplast, complete genome                                       |
| Pugionium dolabratum chloroplast, complete genome                                 |
| Pugionium cornutum chloroplast, complete genome                                   |
| Cakile arabica chloroplast, complete genome                                       |
| Orychophragmus diffusus chloroplast, complete genome                              |
| Orychophragmus taibaiensis chloroplast, complete genome                           |
| Orychophragmus hupehensis chloroplast, complete genome                            |
| Alliaria grandifolia chloroplast, complete genome                                 |
| Cardamine limprichtiana chloroplast, complete genome                              |
| Alyssum desertorum voucher ADES20160707 chloroplast, complete genome              |
| Megadenia pygmaea chloroplast, complete genome                                    |
| Matthiola incana chloroplast, complete genome                                     |
| Solms-laubachia eurycarpa chloroplast, complete genome                            |
| Megacarpaea delavayi chloroplast, complete genome                                 |
| Neotorularia korolkowii chloroplast, complete genome                              |
| Thlaspi arvense chloroplast, complete genome                                      |
| Lepidium meyenii chloroplast, complete genome                                     |
| Tarenaya hassleriana chloroplast, complete genome                                 |
| Arabidopsis lyrata chloroplast, complete genome                                   |
| Arabidopsis halleri chloroplast, complete genome                                  |
| Aethionema arabicum chloroplast, complete genome                                  |
| Arabidopsis lyrata subsp. lyrata chloroplast DNA, complete genome, strain: MN47   |
| Sinapis arvensis chloroplast, complete genome                                     |
| Hesperis matronalis chloroplast, complete genome                                  |
| Hesperis sylvestris chloroplast, complete genome                                  |
| Lobularia libyca chloroplast, complete genome                                     |
| Morettia canescens chloroplast, complete genome                                   |
| Braya humilis chloroplast, complete genome                                        |
| Bunias erucago chloroplast genome, complete sequence, specimen voucher OSBU:12478 |
| Bunias orientalis chloroplast genome, complete sequence, specimen voucher RO12    |
| Arabis flagellosa Kifune chloroplast DNA, complete genome                         |
| Bretschneidera sinensis chloroplast, complete genome                              |
| Draba oreades chloroplast, complete genome                                        |
| Sisymbrium irio chloroplast J04 DNA, complete genome                              |
| Biscutella baetica isolate Bba1 chloroplast, complete genome                      |
| Biscutella lyrata isolate Bly2 chloroplast, complete genome                       |
| Heldreichia bupleurifolia isolate Hbu3 chloroplast, complete genome               |
| Lunaria rediviva isolate Lre4 chloroplast, complete genome                        |
| Ricotia aucheri isolate Rau5 chloroplast, complete genome                         |



|                                                             |
|-------------------------------------------------------------|
| Ricotia carnosula isolate Rca6 chloroplast, complete genome |
| Ricotia cretica isolate Rcr7 chloroplast, complete genome   |
| Ricotia davisiana isolate Rda8 chloroplast, complete genome |
| Ricotia isatoides isolate Ris9 chloroplast, complete genome |
| Ricotia lunaria isolate Rlu10 chloroplast, complete genome  |
| Brassica rapa isolate c13 chloroplast, complete genome      |
| Brassica oleracea isolate HDEM chloroplast, complete genome |
| Moringa oleifera chloroplast, complete genome               |

**Supplemental Table 3.** Data processing summary.

| Family       | Species                         | Genome_Size_Mbp | Raw_reads  | Filtered_reads | Total_reads_sampled | Total_reads_clustered | Percent_unannotated |
|--------------|---------------------------------|-----------------|------------|----------------|---------------------|-----------------------|---------------------|
| Brassicaceae | <i>Aethionema arabicum</i>      | 933.99          | 17,515,712 | 13,704,622     | 500,000             | 298,181               | 0.787799994         |
| Brassicaceae | <i>Meniocus linifolius</i>      | 899.76          | 19,025,676 | 17,900,990     | 500,000             | 205,355               | 0.866199996         |
| Brassicaceae | <i>Barbarea bracteosa</i>       | 268.95          | 17,958,660 | 16,274,282     | 500,000             | 270,845               | 1.117800003         |
| Bataceae     | <i>Batis maritima</i>           | 356.97          | 16,618,110 | 15,093,764     | 500,000             | 177,780               | 0.171599998         |
| Capparaceae  | <i>Boscia sp</i>                | 410.76          | 21,741,004 | 19,951,552     | 500,000             | 195,140               | 1.424399998         |
| Capparaceae  | <i>Capparaceae sp</i>           | 259.17          | 18,732,834 | 15,702,982     | 500,000             | 217,968               | 1.441000001         |
| Brassicaceae | <i>Cakile maritima</i>          | 1383.87         | 20,109,922 | 17,345,778     | 500,000             | 290,826               | 0.769600012         |
| Brassicaceae | <i>Calepina irregularis</i>     | 254.28          | 18,945,186 | 14,996,774     | 500,000             | 230,865               | 0.667199996         |
| Capparaceae  | <i>Capparis fascicularis</i>    | 1139.37         | 20,757,542 | 19,626,330     | 500,000             | 204,412               | 0.881599999         |
| Capparaceae  | <i>Capparis tomentosa</i>       | 611.25          | 18,850,070 | 16,916,978     | 500,000             | 210,754               | 0.937799997         |
| Brassicaceae | <i>Capsella bursa-pastoris</i>  | 420.54          | 19,924,400 | 17,596,938     | 500,000             | 244,673               | 1.018199992         |
| Brassicaceae | <i>Cardamine hirsuta</i>        | 489             | 14,327,238 | 13,353,298     | 500,000             | 236,564               | 0.893800004         |
| Cariaceae    | <i>Carica papaya</i>            | 372             | 26,670,784 | 22,740,686     | 500,000             | 211,407               | 2.305599995         |
| Brassicaceae | <i>Caulanthus amplexicaulis</i> | 484.11          | 17,276,330 | 13,566,798     | 500,000             | 227,219               | 0.618400004         |
| Brassicaceae | <i>Chorispora tenella</i>       | 366.75          | 21,426,658 | 17,199,758     | 500,000             | 255,923               | 0.669999999         |
| Cleomaceae   | <i>Cleome africana</i>          | 484.11          | 14,535,678 | 12,523,252     | 500,000             | 317,696               | 1.167200004         |
| Cleomaceae   | <i>Coalisina angustifolia</i>   | 342.3           | 17,685,930 | 16,598,982     | 300,000             | 143,503               | 1.172000003         |
| Cleomaceae   | <i>Cleome arabica</i>           | 464.55          | 15,921,148 | 12,608,460     | 500,000             | 319,725               | 1.200000004         |
| Cleomaceae   | <i>Polanisia sp</i>             | 709.05          | 16,484,740 | 14,702,180     | 500,000             | 358,263               | 0.9018              |
| Cleomaceae   | <i>Coalisina paradoxa</i>       | 484.11          | 20,093,758 | 17,333,978     | 500,000             | 285,751               | 1.307799997         |
| Cleomaceae   | <i>Cleomaceae sp</i>            | 322.74          | 20,481,152 | 17,552,776     | 500,000             | 294,564               | 1.399400005         |
| Cleomaceae   | <i>Cleome violacea</i>          | 474.33          | 15,366,960 | 13,381,026     | 400,000             | 234,951               | 1.143750005         |
| Cleomaceae   | <i>Melidiscus giganteus</i>     | 420.54          | 18,036,600 | 15,768,938     | 500,000             | 295,440               | 1.648799998         |
| Cleomaceae   | <i>Arivela viscosa</i>          | 268.95          | 18,197,094 | 14,690,618     | 400,000             | 186,177               | 2.092499998         |
| Brassicaceae | <i>Cochlearia officinalis</i>   | 734             | 19,571,568 | 17,680,152     | 500,000             | 309,075               | 0.633400004         |
| Brassicaceae | <i>Crambe hispanica</i>         | 660.15          | 17,962,804 | 16,030,190     | 500,000             | 237,458               | 0.847600007         |
| Brassicaceae | <i>Descurainia pinnata</i>      | 371.64          | 21,064,170 | 18,911,684     | 500,000             | 246,938               | 0.555600003         |
| Brassicaceae | <i>Descurainia sophioides</i>   | 195.6           | 14,299,738 | 11,722,246     | 500,000             | 248,632               | 0.685599997         |
| Brassicaceae | <i>Diptychocarpus strictus</i>  | 557.46          | 14,976,410 | 13,219,700     | 500,000             | 255,043               | 0.805800004         |
| Brassicaceae | <i>Eruca vesicaria</i>          | 709.05          | 19,393,468 | 16,238,972     | 500,000             | 267,256               | 0.8802              |
| Brassicaceae | <i>Erysimum cheiranthoides</i>  | 420.54          | 19,255,900 | 14,718,730     | 500,000             | 258,177               | 1.210200004         |
| Brassicaceae | <i>Euclidium syriacum</i>       | 298.29          | 16,998,370 | 15,169,108     | 500,000             | 223,832               | 0.641799998         |
| Brassicaceae | <i>Farsetia aegyptica</i>       | 2004.9          | 17,029,968 | 16,121,632     | 500,000             | 239,500               | 0.934600003         |
| Brassicaceae | <i>Goldbachia laevigata</i>     | 547.68          | 19,699,580 | 18,035,220     | 500,000             | 231,487               | 0.6218              |
| Brassicaceae | <i>Guillenia lasiophylla</i>    | 621.03          | 11,213,854 | 9,994,886      | 500,000             | 189,388               | 1.013799997         |
| Cleomaceae   | <i>Gynanadropsis gynandra</i>   | 1124.7          | 18,472,870 | 16,563,780     | 500,000             | 320,397               | 0.499200002         |
| Brassicaceae | <i>Hesperis matronalis</i>      | 3261.63         | 15,614,640 | 15,174,086     | 500,000             | 333,859               | 0.537600005         |
| Brassicaceae | <i>Hirschfeldia incana</i>      | 552.57          | 23,055,074 | 21,141,192     | 500,000             | 232,731               | 1.167399996         |
| Brassicaceae | <i>Iberis amara</i>             | 831.3           | 13,691,982 | 13,178,566     | 500,000             | 270,980               | 1.225400004         |
| Brassicaceae | <i>Isatis lusitanica</i>        | 381.42          | 23,390,698 | 17,191,612     | 500,000             | 282,703               | 0.580399999         |
| Brassicaceae | <i>Isatis tinctoria</i>         | 616.14          | 18,892,040 | 15,557,688     | 500,000             | 246,272               | 0.846399996         |

|              |                                   |         |            |            |         |         |             |
|--------------|-----------------------------------|---------|------------|------------|---------|---------|-------------|
| Brassicaceae | <i>Lepidium ruderale</i>          | 371.64  | 18,919,410 | 14,656,664 | 500,000 | 195,884 | 0.829600002 |
| Brassicaceae | <i>Lepidium sativum</i>           | 591.69  | 18,902,354 | 16,242,402 | 500,000 | 245,618 | 0.521800004 |
| Brassicaceae | <i>Lobularia maritima</i>         | 312.96  | 19,156,394 | 14,101,930 | 500,000 | 257,902 | 0.571799998 |
| Brassicaceae | <i>Lunaria annua</i>              | 498.78  | 14,633,200 | 12,998,044 | 500,000 | 313,439 | 0.6024      |
| Brassicaceae | <i>Malcomia maritima</i>          | 312.96  | 15,816,038 | 13,287,250 | 250,000 | 122,050 | 1.107999997 |
| Brassicaceae | <i>Matthiola longipetala</i>      | 1599.03 | 20,089,766 | 19,078,766 | 500,000 | 344,981 | 0.498000005 |
| Moringaceae  | <i>Moringa oleifera</i>           | 386.31  | 20,478,894 | 17,095,412 | 500,000 | 216,954 | 0.590999995 |
| Brassicaceae | <i>Myagrum perfoliatum</i>        | 352.08  | 13,275,434 | 10,829,146 | 400,000 | 220,796 | 0.700749995 |
| Brassicaceae | <i>Nasturtium officinale</i>      | 430.32  | 16,369,294 | 13,096,042 | 500,000 | 270,006 | 0.548799996 |
| Resadaceae   | <i>Ochradenus baccatus</i>        | 870.42  | 18,680,706 | 17,328,066 | 500,000 | 250,676 | 0.341200004 |
| Brassicaceae | <i>Olimoarabidopsis pumila</i>    | 410.76  | 14,092,992 | 11,158,530 | 500,000 | 221,195 | 1.072000003 |
| Brassicaceae | <i>Physaria acutifolia</i>        | 2322.75 | 18,571,300 | 17,404,712 | 500,000 | 361,507 | 1.074200005 |
| Cleomaceae   | <i>Polanisia dodecandra</i>       | 733.5   | 17,592,446 | 16,046,308 | 500,000 | 361,926 | 0.840400003 |
| Cleomaceae   | <i>Polanisia graveolens</i>       | 723.72  | 20,436,352 | 18,930,976 | 500,000 | 362,412 | 0.833199998 |
| Cleomaceae   | <i>Polanisia trachysperma</i>     | 699.27  | 18,164,388 | 14,896,462 | 500,000 | 361,223 | 0.827400004 |
| Brassicaceae | <i>Sisymbrium leucocladum</i>     | 498.78  | 21,306,942 | 17,347,804 | 500,000 | 284,673 | 0.703999996 |
| Brassicaceae | <i>Psychine stylosa</i>           | 518.34  | 18,672,344 | 15,813,984 | 500,000 | 246,922 | 0.815000003 |
| Resadaceae   | <i>Reseda ordorata</i>            | 498.78  | 20,059,938 | 17,972,876 | 500,000 | 296,311 | 0.307800004 |
| Brassicaceae | <i>Rorippa islandica</i>          | 567.24  | 14,323,126 | 12,382,424 | 500,000 | 244,939 | 1.065999997 |
| Brassicaceae | <i>Schizopetalum walkeri</i>      | 1775.07 | 19,473,154 | 18,463,848 | 500,000 | 317,020 | 0.339599997 |
| Brassicaceae | <i>Sinapis alba</i>               | 557.46  | 19,804,700 | 16,543,166 | 500,000 | 249,449 | 0.833399989 |
| Brassicaceae | <i>Sisymbrium brassiciforme</i>   | 371.64  | 18,157,024 | 15,596,368 | 500,000 | 247,748 | 0.779399995 |
| Brassicaceae | <i>Brassicaceae sp</i>            | 1036.68 | 14,359,594 | 12,039,944 | 500,000 | 258,811 | 0.911999998 |
| Brassicaceae | <i>Streptanthus arizonicus</i>    | 1090.47 | 20,032,530 | 17,795,582 | 500,000 | 291,308 | 0.391000003 |
| Brassicaceae | <i>Streptanthus heterophyllus</i> | 748.17  | 20,440,916 | 18,181,630 | 500,000 | 189,327 | 0.588599995 |
| Cleomaceae   | <i>Tarenaya hassleriana</i>       | 435.21  | 24,418,660 | 22,321,972 | 500,000 | 277,209 | 1.194800003 |
| Brassicaceae | <i>Teesdalia nudicaulis</i>       | 557.46  | 17,158,882 | 15,882,064 | 500,000 | 277,737 | 0.503399998 |
| Brassicaceae | <i>Thlaspi arvense</i>            | 205.38  | 13,742,780 | 12,034,208 | 500,000 | 326,494 | 0.530000001 |
| Brassicaceae | <i>Turritis glabra</i>            | 919.32  | 21,721,584 | 19,358,608 | 500,000 | 230,979 | 1.205600012 |
| Cleomaceae   | <i>Cleomella serrulata</i>        | N/A     | N/A        | N/A        | N/A     | N/A     | N/A         |

**Supplemental Table 4.** OUwie weighted AICc scores. Tests conducted are specified below as selection regime ~ modelled phenotype. BM1; single-rate Brownian motion, BMS; Brownian motion with different rate parameters for each state on a tree, OU1; Ornstein-Uhlenbeck model with a single optimum for all species, OUM; Ornstein-Uhlenbeck model with different state means and a single alpha and sigma<sup>2</sup> acting all selective regimes, OUMV; Ornstein-Uhlenbeck model that assumes different state means as well as multiple sigma<sup>2</sup>, OUMA; Ornstein-Uhlenbeck model that assumes different state means as well as multiple alpha, OUMVA; Ornstein-Uhlenbeck model that assumes different state means as well as multiple alpha and sigma<sup>2</sup> per selective regime. Asterisk (\*) indicated analyses which returned the warning, “You might not have enough data to fit this model well”.

| Simmap | Test Conducted                       | OUM             | OU1                   | BM1                   | BMS              | OUMV            | OUMA            | OUMVA           |
|--------|--------------------------------------|-----------------|-----------------------|-----------------------|------------------|-----------------|-----------------|-----------------|
|        | AtAlpha/All ~ Total TE               | 0.03478328      | 0.1026477<br>3        | 0.059294              | <b>0.4075957</b> | 0.05291083      | 0.10698661      | 0.23578184      |
|        | AtAlpha/All ~ Gypsy                  | 0.23758937      | <b>0.3186865</b>      | 0.00295855            | 0.00190546       | 0.14597727      | 0.20500947      | 0.08787339      |
|        | AtAlpha/All ~ Copia                  | 0.29076304      | <b>0.3509629</b>      | 0.00001552            | 0.000009         | 0.15800576      | 0.15221466      | 0.0480291       |
|        | Brassicaceae/Brassicaceae ~ Total TE | 0.09524774      | <b>0.2741048</b>      | 0.0795574             | 0.08170141       | 0.21402713<br>* | 0.15597822<br>* | 0.09938331<br>* |
|        | Brassicaceae/Brassicaceae ~ Gypsy    | 0.11124287      | <b>0.3679953</b>      | 0.32010442            | 0.10217491       | 0.04138997<br>* | 0.03731004<br>* | 0.0197825*<br>* |
|        | Brassicaceae/Brassicaceae ~ Copia    | 0.18430769      | <b>0.5635547</b>      | 0.01588842            | 0.00555477       | 0.10066517<br>* | 0.09134368<br>* | 0.03868553<br>* |
|        | ThAlpha/Cleomaceae ~ Total RE        | 0.09367094<br>* | 0.1104097<br>*        | <b>0.5775217</b><br>* | 0.19361534<br>*  | 0.01500279<br>* | 0.00897249<br>* | 0.00080708<br>* |
|        | ThAlpha/Cleomaceae ~ Gypsy           | 0.27132915<br>* | <b>0.3576261</b><br>* | 0.12686794<br>*       | 0.11919859<br>*  | 0.05904368<br>* | 0.06326126<br>* | 0.00267328<br>* |
|        | ThAlpha/Cleomaceae ~ Copia           | 0.05613062<br>* | <b>0.3893679</b><br>* | 0.17259922<br>*       | 0.36403269<br>*  | 0.00970944<br>* | 0.00778289<br>* | 0.00037727<br>* |
|        | Neo/BMAP ~ Total RE                  | 0.09177786<br>* | 0.1752389<br>*        | <b>0.4870293</b><br>* | 0.16334972<br>*  | 0.01504765<br>* | 0.05696647<br>* | 0.01059003<br>* |
|        | Neo/BMAP ~ Gypsy                     | 0.10288377<br>* | 0.1438035<br>*        | <b>0.4304128</b><br>* | 0.15543752<br>*  | 0.01833382<br>* | 0.14525589<br>* | 0.00387266<br>* |
|        | Neo/BMAP ~ Copia                     | 0.37400051<br>* | <b>0.4134385</b><br>* | 0.01666794<br>*       | 0.00857456<br>*  | 0.11452479<br>* | 0.06447625<br>* | 0.00831744<br>* |
